# Supplementary material for: Comparative Outcomes of Commonly Used Off-Label Atypical Antipsychotics in the Treatment of Dementia-Related Psychosis: A Network Meta-analysis
Source: PubMed Central journal article supplement — Adv Ther. 2022 Mar 5;39(5):1993–2008. doi: 10.1007/s12325-022-02075-8 (PMC9056477; doi:10.1007/s12325-022-02075-8), 2022-03-05
Supplement: 12325_2022_2075_MOESM1_ESM.pdf [file 12325_2022_2075_MOESM1_ESM.pdf]

# **Comparative Outcomes of Commonly Used Off-Label Atypical Antipsychotics in the Treatment of Dementia-Related Psychosis: A Network Meta-analysis**

Ismaeel Yunusa<sup>1†</sup>, Nazia Rashid<sup>2</sup>, George Demos<sup>2</sup>, Bhargavi Mahadik<sup>3</sup>, Victor Abler<sup>2</sup>,  
Krithika Rajagopalan<sup>3</sup>

<sup>1</sup>University of South Carolina, College of Pharmacy, Columbia, SC, USA,

<sup>2</sup>Acadia Pharmaceuticals, Inc, San Diego, CA, USA

<sup>3</sup>Anlitiks Inc., Dover, MA, USA

<sup>†</sup>Former employee of Anlitiks, Inc.

## **Corresponding Author**

Bhargavi Mahadik, MS,  
27 Middlesex Circle, Waltham, MA, 02452  
Anlitiks Inc.,  
Phone: 857-272-5928,  
Email: b.mahadik@anlitiks.com

**Supplementary Table 1. Study and Patient characteristics**

| Study Name                  | Study design          | Population                                                                                                                                                               | N   | Study Period (weeks) | Age Mean age ( $\pm$ SD) | Study Setting                                                        | Comparison                            |
|-----------------------------|-----------------------|--------------------------------------------------------------------------------------------------------------------------------------------------------------------------|-----|----------------------|--------------------------|----------------------------------------------------------------------|---------------------------------------|
| Ballard, 2005               | RCT (double blind)    | AD, dementia, and clinically significant agitation.                                                                                                                      | 93  | 26                   | 83.8 $\pm$ 7.7           | NH                                                                   | Quetiapine vs. Placebo                |
| Brody, 2003                 | RCT (double blind)    | Elderly patients with a DSM-IV diagnosis of dementia of the AD, vascular dementia, or a combination of the 2 (i.e., mixed dementia) and significant aggressive behaviors | 309 | 12                   | 83 $\pm$ 10              | NH                                                                   | Risperidone vs. Placebo               |
| De Deyn, 2004               | RCT (double blind)    | Psychotic AD dementia patients with or without behavioral disturbances                                                                                                   | 652 | 10                   | 76.6 $\pm$ 10.4          | NH                                                                   | Olanzapine vs. Placebo                |
| De Deyn, 2005               | RCT (double blind)    | AD patients with psychosis                                                                                                                                               | 208 | 10                   | 81.5                     | Assisted living facilities or adult communities, or with a caregiver | Aripiprazole vs. Placebo              |
| Deberdt, 2005               | RCT (double blind)    | Patients with dementia-related psychosis                                                                                                                                 | 494 | 10                   | 78.6 $\pm$ 7.3           | NH or assisted living centers                                        | Risperidone/ Olanzapine vs. Placebo   |
| Devanand (ADAD trial), 2011 | Randomized open label | Patients with AD and psychosis or agitation–aggression who responded to risperidone therapy for 16 weeks                                                                 | 110 | 48                   | 79.6 $\pm$ 7.6           | Memory and geriatric psychiatry clinics                              | Risperidone vs. Placebo               |
| Ellingrod, 2002             | Observational study   | Elderly patients with dementia and psychosis                                                                                                                             | 19  | 8                    | 84 $\pm$ 3.17            | NH                                                                   | Risperidone/ Olanzapine vs. Placebo   |
| Gareri, 2004                | RCT (double blind)    | AD/ VaD patients with behavioral and psychological symptoms                                                                                                              | 60  | 8                    | 76.6 $\pm$ 6             | NA                                                                   | Risperidone/ Olanzapine vs. Promazine |
| Grossberg (Study 1), 2019   | RCT (double blind)    | AD with symptoms of agitation and aggression                                                                                                                             | 433 | 12                   | 73.8 $\pm$ 8.7           | Care facility or community-based setting                             | Brexpiprazole vs. Placebo             |
| Grossberg (Study 2), 2019   | RCT (double blind)    | AD with symptoms of agitation and aggression                                                                                                                             | 270 | 12                   | 73.7 $\pm$ 8.2           | Care facility or community-based setting                             | Brexpiprazole vs. Placebo             |
| Katz, 1999                  | RCT (double blind)    | AD, VaD, Mixed dementia                                                                                                                                                  | 625 | 12                   | 82.7 $\pm$ 7.7           | NH                                                                   | Risperidone vs. Placebo               |
| Kurlan, 2007                | RCT (double blind)    | Probable AD with psychosis/agitation and extrapyramidal symptoms                                                                                                         | 40  | 10                   | 73.8 $\pm$ 5.9           | NH or own residence                                                  | Quetiapine vs. Placebo                |

|                          |                     |                                                                |     |    |              |                                                             |                                                                         |
|--------------------------|---------------------|----------------------------------------------------------------|-----|----|--------------|-------------------------------------------------------------|-------------------------------------------------------------------------|
| Mintzer, 2007            | RCT (double blind)  | Institutionalized patients with psychosis associated with AD   | 487 | 10 | 82.7         | NH or residential assisted-living facilities                | Aripiprazole vs. Placebo                                                |
| Mintzer, 2006            | RCT (double blind)  | Nursing home residents diagnosed with AD and psychosis         | 473 | 8  | 83.3 ± 7.3   | NH                                                          | Risperidone vs. Placebo                                                 |
| Mulsant, 2004            | RCT (double blind)  | Probable AD, VaD, or mixed                                     | 86  | 6  |              | NH                                                          | Risperidone vs. Olanzapine                                              |
| Paleacu, 2008            | RCT (double blind)  | AD patients with psycho behavioral symptoms                    | 40  | 6  | 82.2 ± 6.4   | NA                                                          | Quetiapine vs. Placebo                                                  |
| Rainer, 2007             | RCT (Rater-blinded) | Elderly patients with dementia and neurobehavioral symptoms    | 72  | 8  | 77.7 ± 5.90  | Outpatient clinic                                           | Risperidone vs. Quetiapine                                              |
| Street, 2000             | RCT (double blind)  | AD patients who exhibited psychotic and/or behavioral symptoms | 206 | 6  | 82.9 ± 6.5   | NH                                                          | Olanzapine vs. Placebo                                                  |
| Streim, 2008             | RCT (double blind)  | Institutionalized subjects with AD and psychotic symptoms      | 256 | 10 | 83 (59 - 96) | NH                                                          | Aripiprazole vs. Placebo                                                |
| Sultzer (CATIE-AD), 2008 | RCT (double blind)  | AD and psychosis or agitated/aggressive behavior               | 421 | 36 | 77.9 ± 7.5   | Outpatient living at home or in an assisted living facility | Olanzapine vs. Placebo, Quetiapine vs. Placebo, Risperidone vs. Placebo |
| Tariot, 2006             | RCT (double blind)  | Probable/possible AD with psychosis                            | 284 | 10 | 83.2         | NH                                                          | Quetiapine vs. Placebo                                                  |
| Zhong, 2007              | RCT (double blind)  | Probable or possible AD or VaD with agitation                  | 333 | 10 | 83.2 ± 7.2   | NH and assisted living facilities                           | Quetiapine vs. Placebo                                                  |

Abbreviation: SD (Standard deviation); RCT (Randomized controlled trial); AD (Alzheimer disease); VaD (Vascular dementia); DSM (Diagnostic and Statistical Manual of Mental Disorders); NH (Nursing home); NA (Not Applicable)

**Supplementary Figure 1.** Network diagram for efficacy and primary safety outcomes

**a. NPI-NH Psychosis subscale**

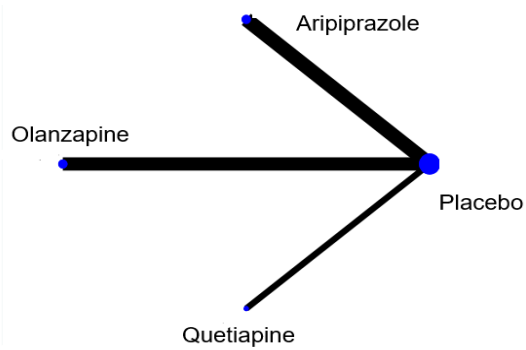

**b. Mortality**

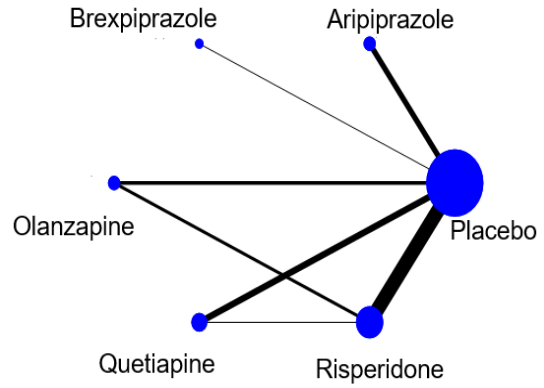

**c. CVAE**

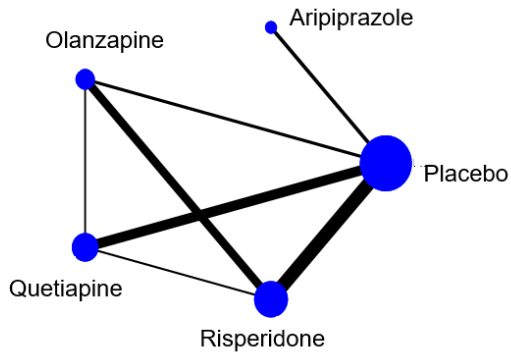

**d. Somnolence**

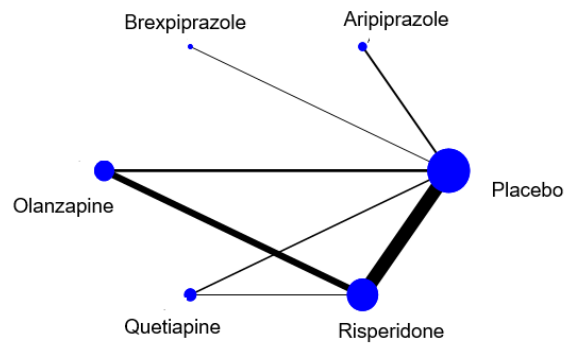

**e. Falls, Fractures, and Injuries (FFI)**

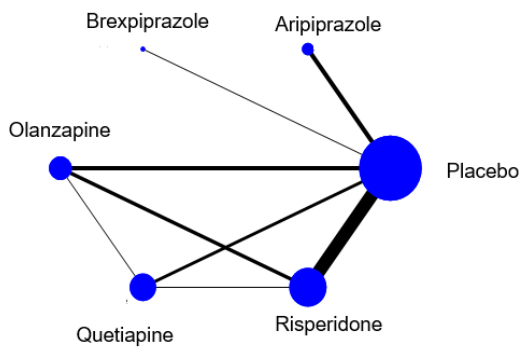

Network diagram depicting AAPs compared in the efficacy and primary safety analysis. The width of each line corresponds to number of trials which compared every pair of treatment while the size of every dot corresponds to the number of patients receiving the AAP (sample size).

**Supplementary Figure 2.** Network diagram for acceptability and other outcomes

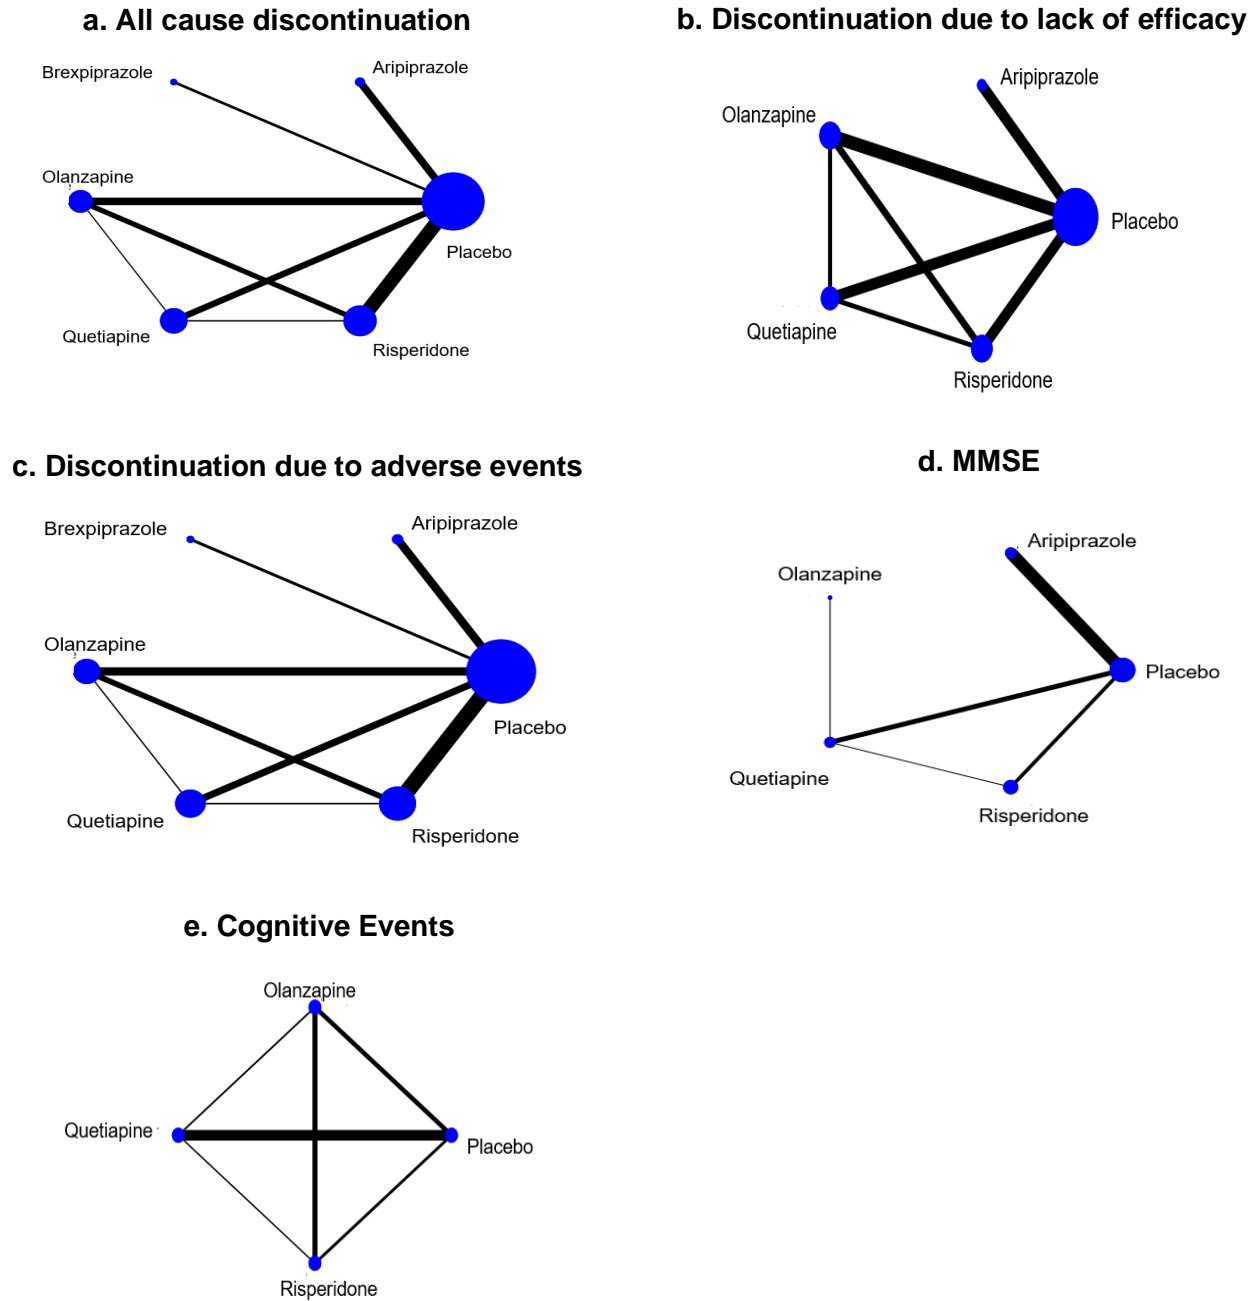

Network diagram depicting AAPs compared in the acceptability and other outcome analysis. The width of each line corresponds to number of trials which compared every pair of treatment while the size of every dot corresponds to the number of patients receiving the AAP (sample size).

**Supplementary Table 2.** Summary table for efficacy and primary safety outcomes of atypical antipsychotics in comparison with each other

| <b>Efficacy Outcome</b>                                                                 |                                  |                                 |                                 |                                |
|-----------------------------------------------------------------------------------------|----------------------------------|---------------------------------|---------------------------------|--------------------------------|
| <b>Comparing Atypical Antipsychotics with Respect to change in NPI-NH</b>               |                                  |                                 |                                 |                                |
| <b>Treatment</b>                                                                        | <b>Aripiprazole</b>              | <b>Brexpiprazole</b>            | <b>Olanzapine</b>               | <b>Quetiapine</b>              |
| Aripiprazole                                                                            |                                  |                                 |                                 |                                |
| Brexpiprazole                                                                           | N/A                              |                                 |                                 |                                |
| Olanzapine                                                                              | -0.05 (-0.32, 0.22) <sup>a</sup> | N/A                             |                                 |                                |
| Quetiapine                                                                              | 0.16 (-0.17, 0.49) <sup>a</sup>  | N/A                             | 0.21 (-0.13, 0.55) <sup>a</sup> |                                |
| Risperidone                                                                             | N/A                              | N/A                             | N/A                             | N/A                            |
| <b>Primary Safety Outcomes</b>                                                          |                                  |                                 |                                 |                                |
| <b>Comparing Atypical Antipsychotics with respect to Mortality</b>                      |                                  |                                 |                                 |                                |
| <b>Treatment</b>                                                                        | <b>Aripiprazole</b>              | <b>Brexpiprazole</b>            | <b>Olanzapine</b>               | <b>Quetiapine</b>              |
| Aripiprazole                                                                            |                                  |                                 |                                 |                                |
| Brexpiprazole                                                                           | 1.41 (0.15, 12.95) <sup>b</sup>  |                                 |                                 |                                |
| Olanzapine                                                                              | 1.40 (0.36, 5.42) <sup>b</sup>   | 0.99 (0.11, 9.26) <sup>b</sup>  |                                 |                                |
| Quetiapine                                                                              | 1.06 (0.29, 3.85) <sup>b</sup>   | 0.76 (0.08, 6.76) <sup>b</sup>  | 0.76 (0.21, 2.80) <sup>b</sup>  |                                |
| Risperidone                                                                             | 1.03 (0.34, 3.08) <sup>b</sup>   | 0.73 (0.09, 5.89) <sup>b</sup>  | 0.74 (0.28, 1.96) <sup>b</sup>  | 0.97 (0.35, 2.70) <sup>b</sup> |
| <b>Comparing Atypical Antipsychotics with respect to CVAE</b>                           |                                  |                                 |                                 |                                |
| <b>Treatment</b>                                                                        | <b>Aripiprazole</b>              | <b>Brexpiprazole</b>            | <b>Olanzapine</b>               | <b>Quetiapine</b>              |
| Aripiprazole                                                                            |                                  |                                 |                                 |                                |
| Brexpiprazole                                                                           |                                  |                                 |                                 |                                |
| Olanzapine                                                                              | 3.53 (0.44, 28.10) <sup>b</sup>  | N/A                             |                                 |                                |
| Quetiapine                                                                              | 1.51 (0.21, 10.75) <sup>b</sup>  | N/A                             | 0.43 (0.10, 1.76) <sup>b</sup>  |                                |
| Risperidone                                                                             | 3.07 (0.46, 20.37) <sup>b</sup>  | N/A                             | 0.87 (0.31, 2.47) <sup>b</sup>  | 2.03 (0.62, 6.67) <sup>b</sup> |
| <b>Comparing Atypical Antipsychotics with respect to Somnolence</b>                     |                                  |                                 |                                 |                                |
| <b>Treatment</b>                                                                        | <b>Aripiprazole</b>              | <b>Brexpiprazole</b>            | <b>Olanzapine</b>               | <b>Quetiapine</b>              |
| Aripiprazole                                                                            |                                  |                                 |                                 |                                |
| Brexpiprazole                                                                           | 0.62 (0.15, 2.65) <sup>b</sup>   |                                 |                                 |                                |
| Olanzapine                                                                              | 1.36 (0.52, 3.74) <sup>b</sup>   | 2.23 (0.60, 8.30) <sup>b</sup>  |                                 |                                |
| Quetiapine                                                                              | 2.44 (0.73, 8.10) <sup>b</sup>   | 3.90 (0.89, 17.16) <sup>b</sup> | 1.75 (0.62, 4.94) <sup>b</sup>  |                                |
| Risperidone                                                                             | 0.89 (0.37, 2.18) <sup>b</sup>   | 1.43 (0.41, 4.96) <sup>b</sup>  | 0.64 (0.40, 1.05) <sup>b</sup>  | 0.37 (0.14, 0.94) <sup>b</sup> |
| <b>Comparing Atypical Antipsychotics with respect to falls, fractures, and injuries</b> |                                  |                                 |                                 |                                |
| <b>Treatment</b>                                                                        | <b>Aripiprazole</b>              | <b>Brexpiprazole</b>            | <b>Olanzapine</b>               | <b>Quetiapine</b>              |
| Aripiprazole                                                                            |                                  |                                 |                                 |                                |
| Brexpiprazole                                                                           | 0.38 (0.07, 2.09) <sup>b</sup>   |                                 |                                 |                                |
| Olanzapine                                                                              | 1.20 (0.72, 2.00) <sup>b</sup>   | 3.14 (0.58, 17.06) <sup>b</sup> |                                 |                                |
| Quetiapine                                                                              | 0.73 (0.40, 1.34) <sup>b</sup>   | 1.91 (0.34, 10.73) <sup>b</sup> | 0.61 (0.34, 1.06) <sup>b</sup>  |                                |
| Risperidone                                                                             | 0.74 (0.48, 1.17) <sup>b</sup>   | 1.95 (0.37, 10.43) <sup>b</sup> | 0.62 (0.44, 0.88) <sup>b</sup>  | 0.93 (0.57, 1.52) <sup>b</sup> |

Comparisons should be read from left to right and are point estimate of <sup>a</sup>standardized mean differences (95% confidence interval) or odds ratio (95% confidence interval). The estimate is in the cell shared between the column defining-treatment and row defining treatment. Significant results do not include 0 in the 95% confidence interval. <sup>b</sup>Significant results do not include 1 in the 95% confidence interval. Abbreviations: NPI-NH (Neuropsychiatric inventory- nursing home); N/A (Not applicable)

**Supplementary Table 3.** Summary table for acceptability outcomes of atypical antipsychotics in comparison with each other

| <b>Comparing Atypical Antipsychotics with Respect to all cause discontinuation</b>               |                     |                      |                   |                   |
|--------------------------------------------------------------------------------------------------|---------------------|----------------------|-------------------|-------------------|
| <b>Treatment</b>                                                                                 | <b>Aripiprazole</b> | <b>Brexpiprazole</b> | <b>Olanzapine</b> | <b>Quetiapine</b> |
| Aripiprazole                                                                                     |                     |                      |                   |                   |
| Brexpiprazole                                                                                    | 1.65 (0.90, 3.03)   |                      |                   |                   |
| Olanzapine                                                                                       | 1.60 (1.04, 2.46)   | 0.97 (0.54, 1.73)    |                   |                   |
| Quetiapine                                                                                       | 1.42 (0.90, 2.24)   | 0.89 (0.47, 1.56)    | 0.89 (0.59, 1.33) |                   |
| Risperidone                                                                                      | 1.40 (0.94, 2.09)   | 0.85 (0.49, 1.48)    | 0.88 (0.65, 1.19) | 0.99 (0.68, 1.43) |
| <b>Comparing Atypical Antipsychotics with Respect to discontinuation due to lack of efficacy</b> |                     |                      |                   |                   |
| <b>Treatment</b>                                                                                 | <b>Aripiprazole</b> | <b>Brexpiprazole</b> | <b>Olanzapine</b> | <b>Quetiapine</b> |
| Aripiprazole                                                                                     |                     |                      |                   |                   |
| Brexpiprazole                                                                                    | 1.30 (0.52, 3.28)   |                      |                   |                   |
| Olanzapine                                                                                       | 1.90 (1.05, 3.43)   | 1.45 (0.59, 3.61)    |                   |                   |
| Quetiapine                                                                                       | 0.90 (0.49, 1.66)   | 0.69 (0.28, 1.74)    | 0.48 (0.29, 0.79) |                   |
| Risperidone                                                                                      | 1.02 (0.60, 1.74)   | 0.78 (0.33, 1.88)    | 0.54 (0.36, 0.80) | 1.13 (0.70, 1.82) |
| <b>Comparing Atypical Antipsychotics with Respect to discontinuation due to adverse events</b>   |                     |                      |                   |                   |
| <b>Treatment</b>                                                                                 | <b>Aripiprazole</b> | <b>Brexpiprazole</b> | <b>Olanzapine</b> | <b>Quetiapine</b> |
| Aripiprazole                                                                                     |                     |                      |                   |                   |
| Brexpiprazole                                                                                    | 1.30 (0.52, 3.28)   |                      |                   |                   |
| Olanzapine                                                                                       | 1.90 (1.05, 3.43)   | 1.45 (0.59, 3.61)    |                   |                   |
| Quetiapine                                                                                       | 0.90 (0.49, 1.66)   | 0.69 (0.28, 1.74)    | 0.48 (0.29, 0.79) |                   |
| Risperidone                                                                                      | 1.02 (0.60, 1.74)   | 0.78 (0.33, 1.88)    | 0.54 (0.36, 0.80) | 1.13 (0.70, 1.82) |

Comparisons should be read from left to right and are point estimate of odds ratio (95% confidence interval). The estimate is in the cell shared between the column defining-treatment and row defining treatment. Significant results do not include 1 in the 95% confidence interval. N/A: Not applicable

**Supplementary Table 4.** Summary table for other outcomes

| <b>Comparing Atypical Antipsychotics with Respect to change in MMSE</b>   |                                   |                                   |                                  |                                        |
|---------------------------------------------------------------------------|-----------------------------------|-----------------------------------|----------------------------------|----------------------------------------|
| <b>Treatment</b>                                                          | <b>Aripiprazole</b>               | <b>Olanzapine</b>                 | <b>Quetiapine</b>                | <b>Placebo</b>                         |
| Aripiprazole                                                              |                                   |                                   |                                  | <b>-0.09 (-0.23, 0.06)<sup>a</sup></b> |
| Olanzapine                                                                | 0.32 (-0.63, 1.27) <sup>a</sup>   |                                   |                                  | <b>0.23 (-0.71, 1.17)<sup>a</sup></b>  |
| Quetiapine                                                                | 0.04 (-0.22, 0.29) <sup>a</sup>   | -0.28, (-1.20, 0.63) <sup>a</sup> |                                  | <b>-0.05 (-0.26, 0.16)<sup>a</sup></b> |
| Risperidone                                                               | -0.063 (-0.34, 0.22) <sup>a</sup> | -0.38 (-1.34, 0.58) <sup>a</sup>  | -0.10 (-0.38, 0.19) <sup>a</sup> | <b>-0.15 (-0.39, 0.09)<sup>a</sup></b> |
| <b>Comparing Atypical Antipsychotics with respect to Cognitive events</b> |                                   |                                   |                                  |                                        |
| <b>Treatment</b>                                                          | <b>Aripiprazole</b>               | <b>Olanzapine</b>                 | <b>Quetiapine</b>                | <b>Placebo</b>                         |
| Aripiprazole                                                              |                                   |                                   |                                  | <b>N/A</b>                             |
| Olanzapine                                                                | N/A                               |                                   |                                  | <b>7.29 (1.39, 38.24)<sup>b</sup></b>  |
| Quetiapine                                                                | N/A                               | 0.27 (0.04, 1.73) <sup>b</sup>    |                                  | <b>1.941 (0.56, 6.68)<sup>b</sup></b>  |
| Risperidone                                                               | N/A                               | 0.38 (0.07, 1.99) <sup>b</sup>    | 1.43 (0.15, 13.50) <sup>b</sup>  | <b>2.76 (0.35, 21.90)<sup>b</sup></b>  |

Comparisons should be read from left to right and are point estimate of <sup>a</sup>standardized mean differences (95% confidence interval) or <sup>b</sup>odds ratio (95% confidence interval). The estimate is in the cell shared between the column defining-treatment and row defining treatment. <sup>a</sup>Significant results do not include 0 in the 95% confidence interval. <sup>b</sup>Significant results do not include 1 in the 95% confidence interval. N/A: Not applicable



**Supplementary Table 5.** Loop specific approach-based inconsistency tests

| Loop                                           | IF    | S.E(IF) | z_value | p_value | cr_95        | Loop_Heterg_tau2 |
|------------------------------------------------|-------|---------|---------|---------|--------------|------------------|
| <b>All cause discontinuation</b>               |       |         |         |         |              |                  |
| 1-5-6                                          | 0.422 | 0.391   | 1.078   | 0.281   | (0.00, 1.19) | 0.000            |
| 1-4-5                                          | 0.305 | 0.612   | 0.498   | 0.619   | (0.00, 1.50) | 0.116            |
| 4-5-6                                          | 0.103 | 0.539   | 0.191   | 0.849   | (0.00, 1.16) | 0.000            |
| 1-4-6                                          | 0.015 | 0.357   | 0.042   | 0.966   | (0.00, 0.71) | 0.056            |
| <b>Discontinuation due to lack of efficacy</b> |       |         |         |         |              |                  |
| 1-3-5                                          | 0.865 | 0.398   | 2.174   | 0.030   | (0.09, 1.64) | 0.000            |
| 1-4-5                                          | 0.366 | 0.811   | 0.451   | 0.652   | (0.00, 1.95) | 0.250            |
| 1-3-4                                          | 0.098 | 0.800   | 0.123   | 0.902   | (0.00, 1.67) | 0.180            |
| 3-4-5                                          | 0.070 | 0.569   | 0.122   | 0.903   | (0.00, 1.19) | 0.000            |
| <b>Discontinuation due to adverse events</b>   |       |         |         |         |              |                  |
| 1-4-5                                          | 0.925 | 0.535   | 1.728   | 0.084   | (0.00, 1.97) | 0.000            |
| 1-4-6                                          | 0.724 | 0.408   | 1.773   | 0.076   | (0.00, 1.53) | 0.000            |
| 1-5-6                                          | 0.404 | 0.504   | 0.801   | 0.423   | (0.00, 1.39) | 0.000            |
| 4-5-6                                          | 0.089 | 0.607   | 0.146   | 0.884   | (0.00, 1.28) | 0.000            |
| <b>Mortality</b>                               |       |         |         |         |              |                  |
| 1-5-6                                          | 0.133 | 2.086   | 0.064   | 0.949   | (0.00, 4.22) | 0.000            |
| 1-4-6                                          | 0.099 | 0.954   | 0.104   | 0.917   | (0.00, 1.97) | 0.000            |
| <b>CVAE</b>                                    |       |         |         |         |              |                  |
| 1-4-5                                          | 0.974 | 1.361   | 0.715   | 0.474   | (0.00, 3.64) | 0.000            |
| 3-4-5                                          | 0.506 | 2.429   | 0.208   | 0.835   | (0.00, 5.27) | 0.000            |
| 1-3-5                                          | 0.470 | 1.213   | 0.388   | 0.698   | (0.00, 2.85) | 0.000            |
| 1-3-4                                          | 0.289 | 1.885   | 0.153   | 0.878   | (0.00, 3.98) | 0.429            |
| <b>Somnolence</b>                              |       |         |         |         |              |                  |
| 1-5-6                                          | 0.581 | 1.649   | 0.352   | 0.725   | (0.00, 3.81) | 0.020            |
| 1-4-6                                          | 0.112 | 0.495   | 0.226   | 0.821   | (0.00, 1.08) | 0.032            |
| <b>FFI</b>                                     |       |         |         |         |              |                  |
| 1-4-5                                          | 0.543 | 0.613   | 0.885   | 0.376   | (0.00, 1.74) | 0.013            |
| 4-5-6                                          | 0.241 | 0.726   | 0.332   | 0.740   | (0.00, 1.66) | 0.000            |
| 1-5-6                                          | 0.104 | 0.843   | 0.123   | 0.902   | (0.00, 1.76) | 0.115            |
| 1-4-6                                          | 0.062 | 0.407   | 0.152   | 0.879   | (0.00, 0.86) | 0.027            |

Inconsistency factors (IF) are ratios of odds ratios (RORs). S.E(IF): Standard error of inconsistency factor. Cr\_95: 95% confidence interval; Loop\_Heterog\_tau2: loop-specific heterogeneity. The p-value for inconsistency was 0.1. Loops with p-value > 0.1 showed evidence of consistency. In loop column; 1= Placebo; 2= Aripiprazole; 3= Brepiprazole; 4= Olanzapine; 5= Quetiapine; 6= Risperidone

**Supplementary Figure 3.** Percentage as shown in the surface under the cumulative ranking curves (SUCRAs) against an imaginary treatment demonstrating no uncertainty and highest ranking. The highest-ranking treatment with no uncertainty will have a SUCRA of 100% while the worst will be 0%. The closer a treatment's SUCRA value is to 100%, the more likely it is to be the more acceptable or safe alternative; the lower and closer the SUCRA value is to 0%, the less likely it is to be the most acceptable or safe alternative.

**a. Mortality**

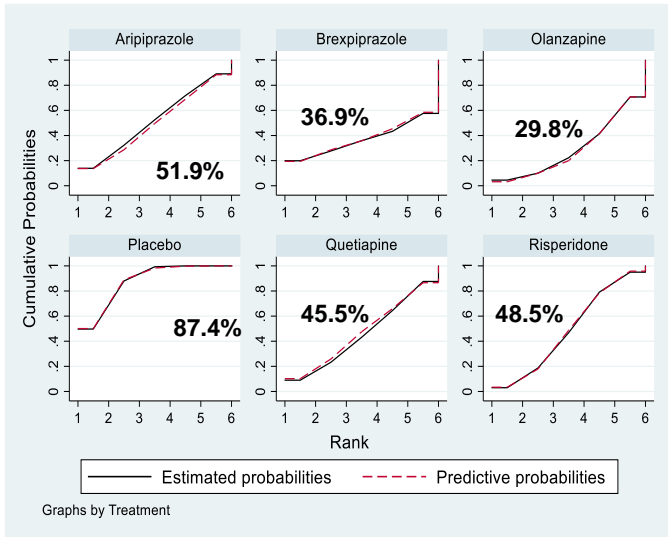

**b. CVAE**

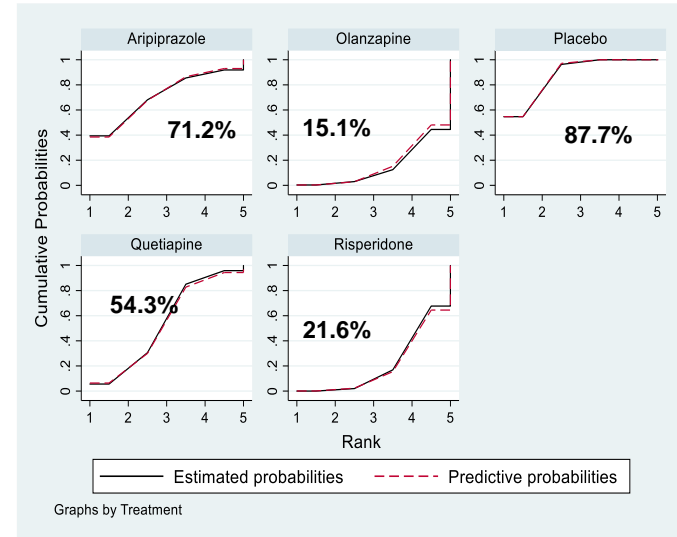

**c. Somnolence**

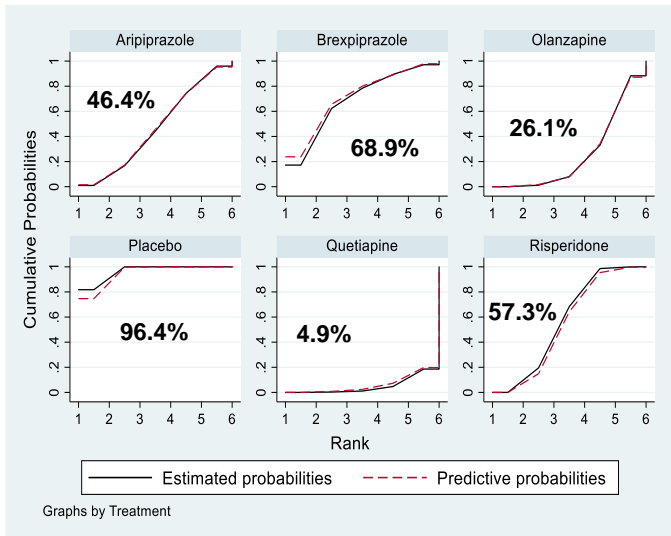

**d. FFI**

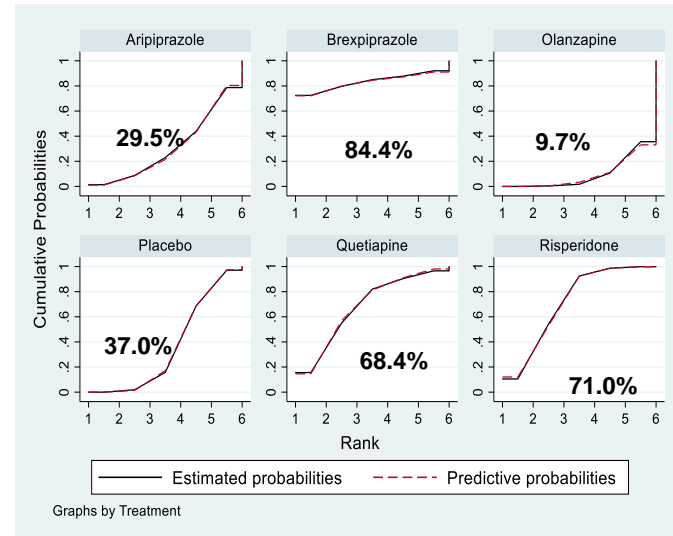

**e. All cause discontinuation**

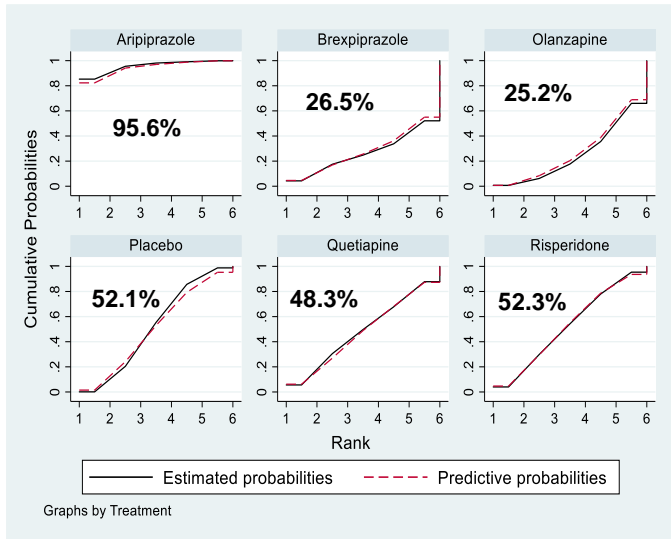

**f. Discontinuation due to lack of efficacy**

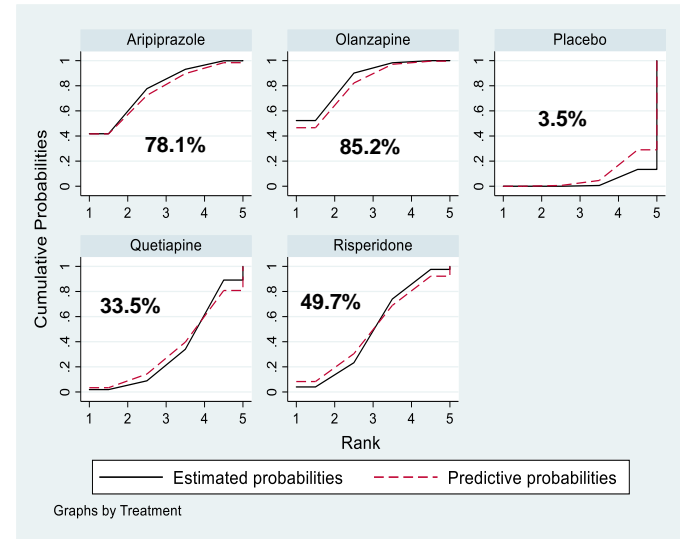

**g. Discontinuation due to adverse events**

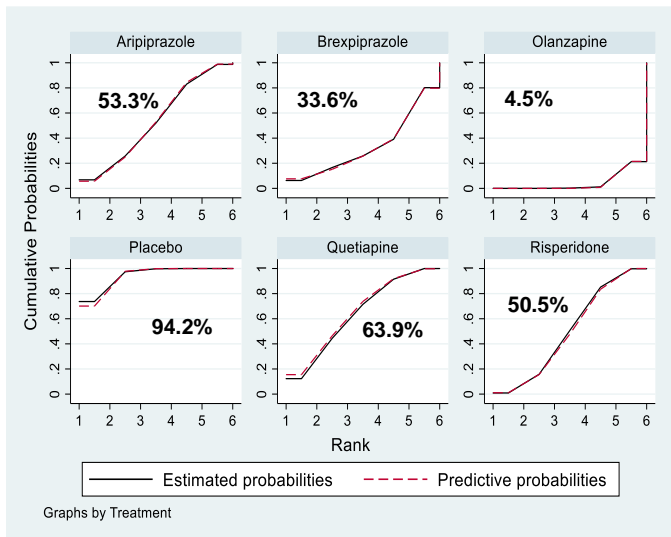

**Supplementary Table 6.** Summary table for secondary safety outcomes

| <b>Comparing Atypical Antipsychotics with respect to Cardiovascular</b> |                     |                      |                   |                     |                           |
|-------------------------------------------------------------------------|---------------------|----------------------|-------------------|---------------------|---------------------------|
| <b>Treatment</b>                                                        | <b>Aripiprazole</b> | <b>Brexpiprazole</b> | <b>Olanzapine</b> | <b>Quetiapine</b>   | <b>Placebo</b>            |
| Aripiprazole                                                            |                     |                      |                   |                     |                           |
| Brexpiprazole                                                           |                     |                      |                   |                     |                           |
| Olanzapine                                                              |                     |                      |                   |                     | <b>4.33 (0.22, 84.37)</b> |
| Quetiapine                                                              |                     |                      | 0.21 (0.01, 5.02) |                     | <b>0.90 (0.29, 2.84)</b>  |
| Risperidone                                                             |                     |                      | 1.00 (0.13, 7.89) | 4.81 (0.43, 54.14)  | <b>4.33 (0.51, 36.56)</b> |
| <b>Comparing Atypical Antipsychotics with respect to EPS</b>            |                     |                      |                   |                     |                           |
| <b>Treatment</b>                                                        | <b>Aripiprazole</b> | <b>Brexpiprazole</b> | <b>Olanzapine</b> | <b>Quetiapine</b>   | <b>Placebo</b>            |
| Aripiprazole                                                            |                     |                      |                   |                     | <b>1.20 (0.22, 6.72)</b>  |
| Brexpiprazole                                                           | 1.77 (0.23, 13.40)  |                      |                   |                     | <b>2.14 (0.74, 6.20)</b>  |
| Olanzapine                                                              | 4.36 (0.57, 33.50)  | 2.46 (0.54, 11.29)   |                   |                     | <b>5.25 (1.75, 15.73)</b> |
| Quetiapine                                                              | 0.89 (0.13, 6.01)   | 0.50 (0.13, 1.94)    | 0.20 (0.06, 0.70) |                     | <b>1.07 (0.46, 2.47)</b>  |
| Risperidone                                                             | 3.15 (0.51, 19.62)  | 1.78 (0.52, 6.07)    | 0.72 (0.25, 2.06) | 3.55 (1.45, 8.69)   | <b>3.80 (2.04, 7.07)</b>  |
| <b>Comparing Atypical Antipsychotics with respect to Akathisia</b>      |                     |                      |                   |                     |                           |
| <b>Treatment</b>                                                        | <b>Aripiprazole</b> | <b>Brexpiprazole</b> | <b>Olanzapine</b> | <b>Quetiapine</b>   | <b>Placebo</b>            |
| Aripiprazole                                                            |                     |                      |                   |                     | <b>N/A</b>                |
| Brexpiprazole                                                           | N/A                 |                      |                   |                     | <b>1.95 (0.27, 13.94)</b> |
| Olanzapine                                                              | N/A                 | N/A                  |                   |                     | <b>N/A</b>                |
| Quetiapine                                                              | N/A                 | 0.16 (0.007, 7.35)   | N/A               |                     | <b>0.32 (0.01, 8.26)</b>  |
| Risperidone                                                             | N/A                 | 0.97 (0.11, 8.69)    | N/A               | 5.95 (0.20, 178.27) | <b>1.89 (0.72, 4.96)</b>  |

Comparisons should be read from left to right and are point estimate of odds ratio (95% confidence interval). The estimate is in the cell shared between the column defining-treatment and row defining treatment. Significant results do not include 1 in the 95% confidence interval. Abbreviation: EPS (Extrapyramidal symptoms); N/A (Not applicable)
